# Supplementary material for: Pattern Dynamics in Adaxial-Abaxial Specific Gene Expression Are Modulated by a Plastid Retrograde Signal during Arabidopsis thaliana Leaf Development
Source: PubMed Central journal article supplement (PMC3723520; doi:10.1371/journal.pgen.1003655), 2013-07-25
Supplement: pgen.1003655.s014.pdf [file pgen.1003655.s014.pdf]

1       **Text S1**

2  
3       **The efficiency and spatio-temporal specificity of the CRE/loxP recombination**

4       When the plants harboring the *FILpro:CRE-GR 35Spro:loxP-Ter-loxP-VENUS*  
5 system were constantly treated with DEX from germination, the VENUS signal was  
6 detected in the whole or almost the whole leaves (Figure S3C, S3D) and in the abaxial  
7 half of flower primordia (Figure S3A). However, the signal was absent from the adaxial  
8 half of flower primordia and the apical meristem (Figure S3A). This result indicates that  
9 these VENUS-negative cells had not expressed *FIL* since germination, which is  
10 consistent with previous studies that showed the absence of *FIL* expression from apical  
11 meristem and adaxial half of flower primordia [1-2] (Figure S3B). From this result, we  
12 concluded that the CRE-loxP recombination specifically occurs with high efficiency in  
13 the *FIL*-expressing cells, but does not in the non-expressing cells.

14       The *FILpro:CRE-GR 35Spro:loxP-Ter-loxP-VENUS* plants were also grown on the  
15 DEX-free medium from the seeds to check the frequency of DEX-independent  
16 recombination. As a result, dotted patterns of VENUS-expressing cells were observed  
17 (Figure S3E, S3F), indicating that the DEX-dependent association between the  
18 CRE-GR and loxP site on the DNA is leaky in our system. Nonetheless, average sizes  
19 of these DEX-independent clones were only 0.77 percent of adaxial epidermis and 7.07  
20 percent of abaxial epidermis in mature leaves (Figure S3E, S3F). Such frequencies are  
21 low enough to analyze the dynamic changes in the *FIL* expression pattern during the  
22 leaf development.

23       We also observed the VENUS expression pattern soon after the DEX application to  
24 the *FILpro:CRE-GR 35Spro:loxP-Ter-loxP-VENUS* plants grown on the DEX-free  
25 medium. The VENUS fluorescence showed dotted patterns at six hours after the DEX  
26 application (Figure S3G), and the patterns similar to that of *FILpro:GFP* at twelve  
27 hours after the application (Figure S3H). Therefore, the CRE/loxP recombination is  
28 efficiently induced in the *FIL*-expressing cells within half a day. Because the VENUS  
29 expression domain appeared to be slightly broader than that of *FILpro:GFP*, it was  
30 suggested that *FILpro:GFP* expression was repressed during the time from DEX  
31 application to the observation and/or that CRE has enough DNA recombinase activity at  
32 only low concentration at which GFP protein does not give detectable green  
33 fluorescence.

1 From these results, we concluded that our CRE/loxP system traces the cell lineage  
2 patterns of the *FIL*-expressing cells from the DEX application with enough efficiency  
3 and specificity.

#### 4 **References**

- 5 1. Heisler MG, Ohno C, Das P, Sieber P, Reddy GV, et al. (2005) Patterns of auxin  
6 transport and gene expression during primordium development revealed by live  
7 imaging of the *Arabidopsis* inflorescence meristem. *Curr Biol* 15: 1899-1911.
- 8 2. Goldshmidt A, Alvarez JP, Bowman JL, Eshed Y (2008) Signals derived from  
9 *YABBY* gene activities in organ primordia regulate growth and partitioning of  
10 *Arabidopsis* shoot apical meristems. *Plant Cell* 20: 1217-1230.
